# Supplementary material
Source: Springer Nature journal article supplement (https://www.springermedizin.de/resource/supplementary/12992_2008_62_MOESM2_ESM.pdf/9616410)

L 14

010101

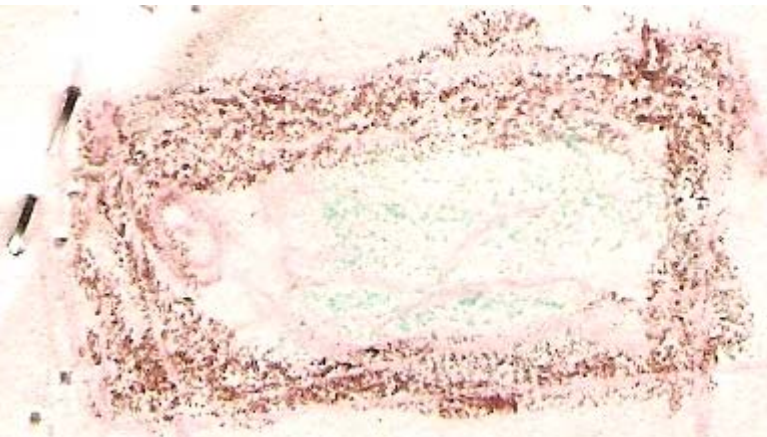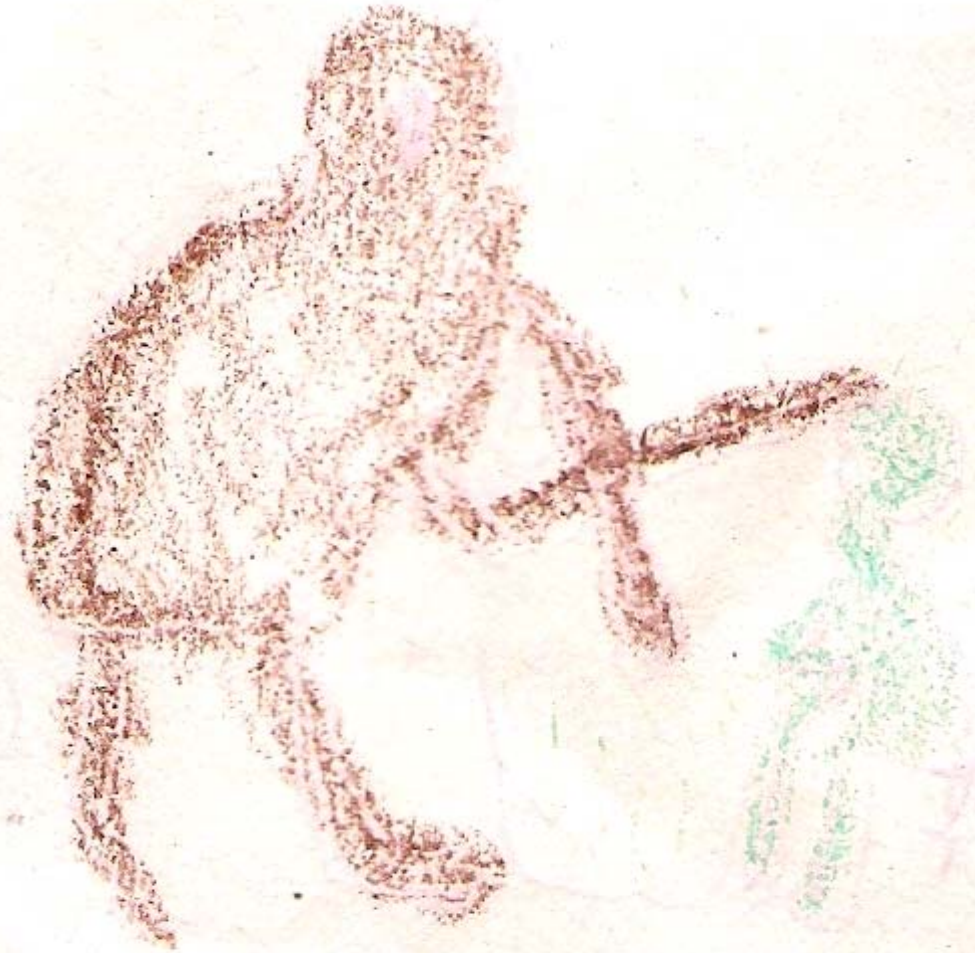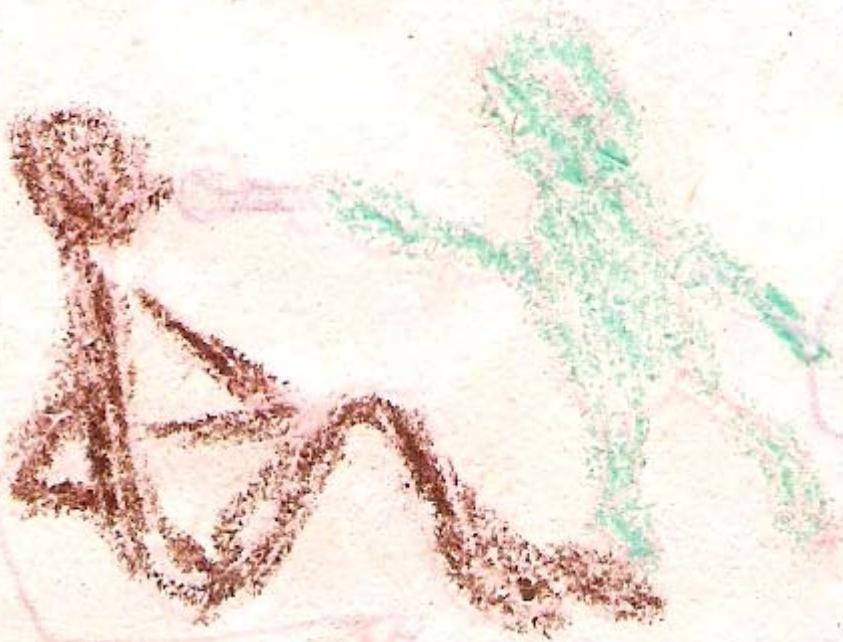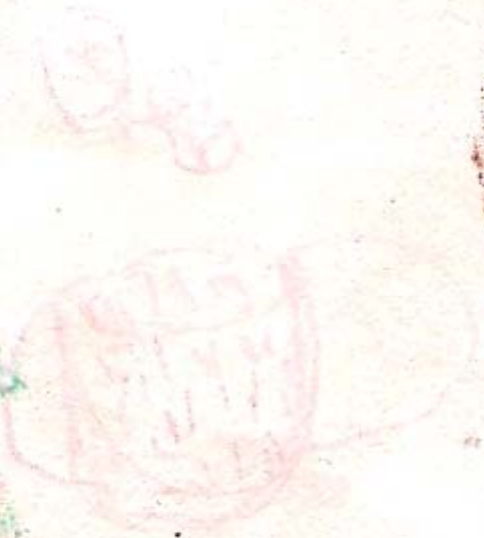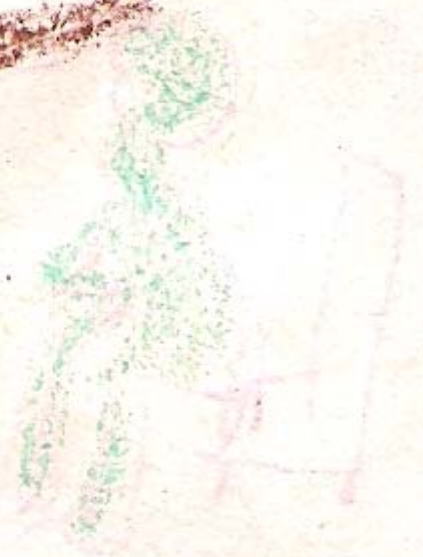

Supplement: MOESM2 [file 9616410]
